# Supplementary material for: A two-step merging strategy for incorporating multi-source precipitation products and gauge observations using machine learning classification and regression over China
Source: Copernicus journal article supplement (doi:10.5194/hess-2021-642), 2022-01-17
Supplement: Supplementary file [file hess-2021-642-AC1-supplement.pdf]

Overall comments:

Thank you for providing me the opportunity to review the entitled manuscript " A two-step merging strategy for incorporating multi-source precipitation products and gauge observations using machine learning classification and regression over China". It's an interesting study and fits the scope of the Journal. However, there are several major and minor flaws that authors should take care of and revise before final consideration in high-quality peer-review Journals like Hydrology and Earth System Science. Authors should improve the quality of the manuscript including research outcomes, discussion, and unique conclusions.

Response: Thanks very much for your valuable and meaningful suggestions on our manuscript. These comments significantly improve the quality of this manuscript. We have tried our best to carefully study the suggestions you raised and made corresponding modifications to the manuscript. The grammar of the manuscript has been polished by a native English speaker. The responses to the reviewer's comments are as follows:

1- In the abstract, there are too many simple conclusive statements in the abstract, which are well-known to people who are involved in this area. You should first layout a background information description. Second, point out what is the most important in the current field of research and what has not yet been solved. Third, explain your novel method in detail how you solve this problem. Last, a brief description of your own findings should be presented. If your methods and findings are novel and interesting to people who are involved in this area, they will continue to read your main text.

Response: the abstract has been rewritten to highlight the key information of this study according to your so patient suggestions. The revised Abstract is as follows:

**Abstract.** Although many multi-source precipitation products (MSPs) with high spatio-temporal resolution have been extensively used in water cycle research, they are still subject to various biases, including false alarm and missed bias. Precipitation merging technology is an effective means to alleviate this uncertainty. However, how to efficiently improve precipitation detection efficiency and precipitation intensity simultaneously is a problem worth exploring. This study presents a two-step merging strategy based on machine learning (ML) algorithms, including gradient boosting decision tree (GBDT), extreme gradient boosting (XGBoost), and random forest (RF). It

incorporates six state-of-the-art MSPs (GSMaP, IMERG, PERSIANN-CDR, CMORPH, CHIRPS, and ERA5-Land) and rain gauges to improve the accuracy of precipitation from precipitation identification and estimation during 2000-2017 over China. Multiple environment variables and spatial autocorrelation are combined in the merging process. The strategy first employs classification models to identify wet and dry days and then combines regression models to predict precipitation amounts based on classified wet days. The merged results are compared with traditional methods, including multiple linear regression (MLR), ML regression models, and gauge-based Kriging interpolation. A total of 1680 (70%) rain gauges are randomly chosen for model training and 692 (30%) for performance evaluation. The results show that: (1) The multi-sources merged precipitation products (MSMPs) outperformed all original MSPs in terms of statistical and categorical metrics, which substantially alleviates the bias and deviation in temporal and spatial. The modified Kling-Gupta efficiency (KGE), critical success index (CSI), and Heidke Skill Score (HSS) of original MSPs have been improved by 15-85%, 17-155%, and 21-166%, respectively. (2) The spatial autocorrelation plays a significant role in precipitation merging, which considerably improves the model accuracy. (3) The performance of MSMPs obtained by this method is superior to MLR, Kriging interpolation, and ML regression models. XGBoost algorithm is more recommended for large-scale data merging owing to its high computational efficiency. (4) The two-step merging strategy performs better when higher density gauges are used to model training. But it has strong robustness and can also obtain better performance than original MSPs even when the gauges number is reduced to 10%. This study provides an accurate and reliable method to improve precipitation accuracy under complex climatic and topographic conditions. It could be applied to other areas well if rain gauges are available.

2- It is recommended that the author rewrite the INTRODUCTION, increase the citation of the literature, and extract questions and useful information from the literature. Through literature review, point out the shortcomings of existing research, thus leading to the article's hydrological and environmental significance and purpose. In this section, the literature review needs to be more critical.

**Response: Thanks! Your suggestions are very helpful in improving the quality of introduction. Through reviewing more literatures, the shortcomings of existing research and advantage of this**

research has been concluded. The Introduction has been rewritten in the revised manuscript.

3- The authors should detail the methodological novelties with the vast amount of existing literature in this area in the Introduction.

Response: The methodological novelties have been elaborated in detail in the Introduction. The corresponding contents have been modified in the revised manuscript.

4- The authors should address the clear objectives of the study in the introduction section.

Response: The objectives of the study have been rewritten to make it more clear for readers and are as follow:

The objectives of this study mainly include three-folds: The objectives of this study mainly include three-folds: (1) exploring the effectiveness of the proposed strategy in all aspects according to various metrics; (2) comparing the performance of the proposed strategy with traditional methods; (3) assessing the influence of MSPs' spatial resolution and gauge density on model performance. This strategy is expected to improve the accuracy of existing MSP and explore the potential of more ML algorithms in precipitation.

5- In the discussions, comparisons of the results obtained in this manuscript with the extensive existing literature on Satellite-based precipitation and the methodologies used need to be expanded. I recommend authors should compare results with previous approaches. In discussions, it must add what the results mean with respect to what is already known and highlight how your results support or refute the current hypotheses in the field if any. More references should be added to that section. Underline how your results make a significant move in the working field forward.

Response: Thanks for your suggestions, which greatly improved the quality of the Discussion. The method proposed in this study have been compared with extensive previous studies from the aspects of implement difficulty, efficiency, and accuracy. An individual section is added in Discussion to detailly state the new information of the results and highlight the superiority of the proposed method. The detailed information has been added in the revised manuscript.

6- It's is recommended to improve the quality of grammar and take care of grammar mistakes.

Response: the grammar problems in the whole manuscript have been carefully checked and

improved by a native English speaker.

7- Line# 115-120 Expand the hydro-metrological features of the study region with more explanations (Study area).

Response: The description of the hydro-metrological features of the study region have been expanded in the revised manuscript.

8- Line# 230-240 I am wondering if the technique applied by authors is correctly classified for wet and dry events. Authors only attempted to correct precipitation events fall in wet events. I recommend techniques should test with combined dry and wet days because measurement techniques for all precipitation datasets are quite different and definitely there would be a lag between wet and dry events for all different datasets which could create outliers in applied techniques.

Response: The biases of precipitation products mainly come from overestimating/underestimating the amounts of hit events, and failing to correctly distinguish precipitation occurrence, including false alarm and missed events. It is difficult to reduce all biases by directly correcting the precipitation amount of all samples. This is the main reason why we chose a two-step methodology to merge products.

The classification model determines whether a day is a wet day or a dry day according to the classification probability. In this way, all days are classified into wet or dry days. The classification results are evaluated with 692 independently rain gauges, and the evaluated result show classification models show better performance. In addition, as you said, the techniques should test with combined dry and wet days. I am not sure I have correctly understood your suggestion, i.e., directly using the regression models to merge precipitation products including dry and wet days of the entire events rather than distinguishing dry and wet days separately (Fig. R1). To compare the difference between the two techniques, the merged results of using only regression models and using both classification and regression models are shown in discussion, the main conclusions are as follows (Table R1):

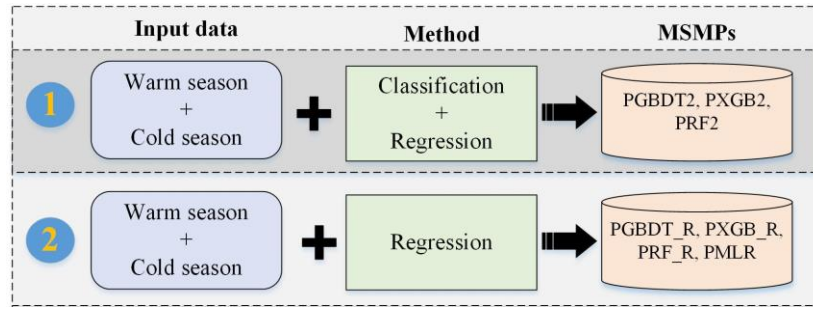

Fig. R1 two merging techniques

Table R1 The compared results of the two techniques

|          | MSMPs   | CC   | CSI  | KGE  | FB   | HSS  |
|----------|---------|------|------|------|------|------|
| Method 1 | PGBDT2  | 0.85 | 0.75 | 0.76 | 0.96 | 0.79 |
|          | PXGB2   | 0.85 | 0.75 | 0.76 | 0.99 | 0.79 |
|          | PRF2    | 0.85 | 0.76 | 0.74 | 0.98 | 0.80 |
| Method 2 | PMLR    | 0.83 | 0.63 | 0.70 | 1.40 | 0.64 |
|          | PGBDT_R | 0.85 | 0.66 | 0.76 | 1.40 | 0.67 |
|          | PXGB_R  | 0.84 | 0.67 | 0.76 | 1.38 | 0.68 |
|          | PRF_R   | 0.85 | 0.67 | 0.74 | 1.39 | 0.68 |

It can be seen from Table R1 that the technique (Method 1) applied in this study is obviously better than the technique combined the wet and dry days based on regression models. The performance of categorical metrics (CSI, FB, and HSS) is higher and the statistical metrics (CC and KGE) is also well. Therefore, it is reliable and beneficial to improve the accuracy of merged products to firstly classify wet and dry events.

9- Authors have merged ground observations data with different precipitation estimates. While different precipitation products have different spatial resolutions which could cause outliers when merging with ground observations. Apart from these, the authors used a simplified approach to merge coarse resolution precipitation products with ground observations data. Rainfall within a single satellite pixel could vary considerably by 38% between two gauges located within  $4 \text{ km} \times 4 \text{ km}$ . The deviation between gridded precipitation and single gauge observation is due to the discrepancy of scale and could be reduced by increasing the validation stations or downscaling the TRMM precipitation to a finer resolution. Therefore, authors should firstly downscale all gridded

precipitation datasets at a finer scale and then merge with ground observational data to make the approach more novel towards environmental significance. The author can learn lessons from the following papers.

Response: The spatial scale mismatch between gauge and pixel has always been a great challenge in satellite products verification and fusion. We assumed that rain gauges represent the areal precipitation in their corresponding pixels. It's not easy to downscale the daily precipitation with long periods (2000-2017) to a finer resolution (1km or 5km) over such a large area (about 9.6 million km<sup>2</sup>). Several precipitation products used in this study. It would be time-consuming and lead to massive amount of data to downscale all of them, which will further bring a computational difficulty to next data fusion grid by grid. Meanwhile, most studies focused to downscale precipitation at monthly or annual scales (Jia et al., 2011; Shi et al., 2015; Jing et al., 2016; Ma et al., 2017; Chen et al., 2018; Chen et al., 2021; Ghorbanpour et al., 2021; Shen and Yong, 2021), the land surface variable with high resolution is unavailable at the daily scale, such as the 8d Land surface temperature product (MOD10A2) and 16d Normalized vegetation index products (MOD13Q1). Therefore, downscaling precipitation at higher temporal scales (e.g., daily or hourly) is challenging since the relationships between environmental variables and precipitation on these scales are far less evident and difficult to capture (Chen et al., 2021).

In addition, this study focuses on high-efficiency precipitation merging methods rather than downscaling methods. As many previous studies have done (Chao et al., 2018; Zhang et al., 2020; Baez-Villanueva et al., 2020; Wu et al., 2020; Wang et al., 2020; Hong et al., 2021), we use simple interpolation methods to resample product to keep its value and avoid other additional uncertainties. Meanwhile, considering the IMERG is the extension of TMPA, ERA5 has already superseded ERA-Interim (discontinued from August 2019). For reproducibility purposes, we disregarded TMPA and replaced ERA-Interim with ERA5-Land product. Therefore, six products are used in this study, among which four products (IMERG, GSMaP, CHIRPS, and ERA5-Land) have a spatial resolution of less than or equal to 0.1°, and only two products (CMORPH and PERSIANN-CDR) have a coarse spatial resolution of 0.25°. We resampled the latter products into 0.1° to keep the same resolution with other products, and believe that have a slight impact on the merging results. To prove this statement, we discuss the effect of using products with different spatial resolutions in Discussion.

In the future, many efforts will be focused on the downscaling method based on this study to

obtain high precision-resolution daily precipitation products over China.

Jia, S., Zhu, W., Lü, A., Yan, T., 2011: A statistical spatial downscaling algorithm of TRMM precipitation based on NDVI and DEM in the Qaidam Basin of China. *Remote sensing of Environment*, 115(12), 3069-3079.

Shi, Y., Song, L., Xia, Z., Lin, Y., Myneni, R. B., Choi, S., Wang, L., Ni, X., Lao, C., Yang, F., 2015. Mapping annual precipitation across mainland China in the period 2001–2010 from TRMM3B43 product using spatial downscaling approach. *Remote Sensing*, 7(5), 5849-5878.

Jing, W., Yang, Y., Yue, X., & Zhao, X., 2016: A spatial downscaling algorithm for satellite-based precipitation over the Tibetan plateau based on NDVI, DEM, and land surface temperature. *Remote Sensing*, 8(8), 655.

Ma, Z., Shi, Z., Zhou, Y., Xu, J., Yu, W., & Yang, Y., 2017: A spatial data mining algorithm for downscaling TMPA 3B43 V7 data over the Qinghai–Tibet Plateau with the effects of systematic anomalies removed. *Remote Sensing of Environment*, 200, 378-395.

Chen, Y., Huang, J., Sheng, S., Mansaray, L. R., Liu, Z., Wu, H., Wang, X., 2018: A new downscaling-integration framework for high-resolution monthly precipitation estimates: Combining rain gauge observations, satellite-derived precipitation data and geographical ancillary data. *Remote Sensing of Environment*, 214, 154-172.

Ghorbanpour, A. K., Hessels, T., Moghim, S., Afshar, A., 2021. Comparison and assessment of spatial downscaling methods for enhancing the accuracy of satellite-based precipitation over Lake Urmia Basin. *Journal of Hydrology*, 596, 126055.

Shen, Z., Yong, B., 2021. Downscaling the GPM-based satellite precipitation retrievals using gradient boosting decision tree approach over Mainland China. *Journal of Hydrology*, 602, 126803.

Baez-Villanueva, O.M., Zambrano-Bigiarini, M., Beck, H.E., McNamara, I., Ribbe, L., Nauditt, A., Birkel, C., Verbist, K., Giraldo-Osorio, J.D., Xuan Thinh, N.: RF-MEP: A novel Random Forest method for merging gridded precipitation products and ground-based measurements, *Remote Sens. Environ.*, 239, 111606, <https://doi.org/10.1016/j.rse.2019.111606>, 2020

Chen, C., Hu, B., Li, Y.: Easy-to-use spatial Random Forest-based downscaling-calibration method for producing high resolution and accurate precipitation data, *Hydrol. Earth Syst. Sci.*, <https://doi.org/10.5194/hess-2021-332>, 2021.

Chao, L., Zhang, K., Li, Z., Zhu, Y., Wang, J., Yu, Z.: Geographically weighted regression based methods for merging satellite and gauge precipitation, *J. Hydrol.*, 558, 275-289, <https://doi.org/10.1016/j.jhydrol.2018.01.042>, 2018

Zhang, L., Li, X., Cao, Y., Nan, Z., Wang, W., Ge, Y., Wang, P., Yu, W.: Evaluation and integration of the top-down and bottom-up satellite precipitation products over mainland China. *J. Hydrol.* 581, 124456, 2020.

Wu, H., Yang, Q., Liu, J., Wang, G.: A spatiotemporal deep fusion model for merging satellite and gauge precipitation in China, *J. Hydrol.*, 584, 124664, <https://doi.org/10.1016/j.jhydrol.2020.124664>, 2020.

Wang, Y., Wang, L., Li, X., Zhou, J., Hu, Z.: An integration of gauge, satellite, and reanalysis precipitation datasets for the largest river basin of the Tibetan Plateau. *Earth System Science Data*, 12(3), 1789-1803, 2020.

Hong, Z., Han, Z., Li, X., Long, D., Wang, J.: Generation of an improved precipitation data set from multisource information over the Tibetan plateau. *J. Hydrometeorol.*, <https://doi.org/10.1175/JHM-D-20-0252.1>, 2021.

10- The study region covers complex hydro-topographical features and some of the stations are located in snow and glacier coverage regions (e.g., Tibetan Plateau) and hence observed precipitation in these regions is unreliable and unavailable. Therefore, the orographic correction of precipitation based on the vertical gradients along with glacier mass balance is required to retrieve an accurate precipitation dataset in high-altitude mountain regions such as Tibetan Plateau and some others. Authors can take glacier mass variations from GRACE data and try to correct precipitation for high-altitude regions.

Response: Thank you very much for your useful and novel suggestions.

The gauge observations suffer from some uncertainties, including wind-induced undercatch, wetting loss, and evaporation loss, which are more obvious in mountainous areas with complex terrain. Nevertheless, we take gauge observations as the true value in many literatures because it is the most direct means of obtaining precipitation (Lei et al., 2021; Xiao et al., 2022; Xu et al., 2022). In general, the gauges are used as the benchmark to validate and correct the errors of satellite products.



There are few attempts to use satellite products to correct observed precipitation, because additional errors may be caused due to the inherent uncertainties in products. Most importantly, even correcting for observation precipitation with glacier mass balance, it is difficult to assess the reliability of corrected observations due to the lack of validation data.

The glacier mass balance from GRACE has uncertainty (Velicogna and Wahr, 2013; Wouters et al., 2019; Wang et al., 2020) and is also suffered from some limitations. This uncertainty will be further propagated to precipitation correction. GRACE has a shorter temporal span and is discontinuous in time. Meanwhile, it has a coarse temporal resolution (monthly) and a spatial resolution ( $0.5^\circ$  or  $1^\circ$ ), while the temporal/spatial resolution of this study is daily/ $0.1^\circ$  from 2000-2017. Using GRACE for precipitation correction may lead to spatio-temporal scale mismatch and may not achieve the desired effect. In addition, the application of GRACE in Tibetan Plateau is different because it is strongly influenced by land water storage, such as the increase of water storage in lakes on the Tibetan Plateau (Wang et al., 2020). Therefore, it is a promising and challenging work to use glacier mass balance data for precipitation correction at high latitudes.

This issue is a limitation of this study and explained in the Discussion in the revised manuscript. In further work, we will consider the Tibetan Plateau separately and add more auxiliary data (such as snow depth and snow water equivalent) to further optimize precipitation at high altitudes.

Lei, H., Li, H., Zhao, H., Ao, T., Li, X.: Comprehensive evaluation of satellite and reanalysis precipitation products over the eastern Tibetan plateau characterized by a high diversity of topographies, *Atmos. Res.*, 259, <https://doi.org/10.1016/j.atmosres.2021.105661>, 2021.

Xiao, S., Zou, L., Xia, J.: Bias correction framework for satellite precipitation products using a rain/no rain discriminative model, *Sci. Total Environ.*, <https://doi.org/10.1016/j.scitotenv.2021.151679>, 2021.

Xu, J., Ma, Z., Yan, S., Peng, J.: Do ERA5 and ERA5-land precipitation estimates outperform satellite-based precipitation products? A comprehensive comparison between state-of-the-art model-based and satellite-based precipitation products over mainland China. *Journal of Hydrology*, 605, 127353.2022.

Velicogna, I., Wahr, J.: Time-variable gravity observations of ice sheet mass balance: Precision and limitations of the GRACE satellite data. *Geophysical Research Letters*, 40(12), 3055-3063, 2013.

Wouters, B., Gardner, A. S., Moholdt, G.: Global glacier mass loss during the GRACE satellite mission (2002-2016). *Frontiers in earth science*, 7, 96, 2019.

Wang, Q., Yi, S., & Sun, W.: Continuous estimates of glacier mass balance in high mountain Asia based on ICESat-1, 2 and GRACE/GRACE follow-on data. *Geophysical Research Letters*, 48(2), e2020GL090954, 2021

11- Add a limitation section that explains any limitations that your hypothesis or experimental approach might have and the reasoning behind it and some of them I have clearly mentioned. This will help the field in generating hypotheses and new approaches without facing the same challenges. The discussion becomes well-rounded when you emphasize not only the impact of the study but also where possibly it falls short. Consider posing a few questions or directions, preferably in the form of a hypothesis, to provide a launchpad for future research.

**Response:** the limitations and uncertainties of this study have been added in Discussion. It explains the uncertainties of gauge observations, spatial scale mismatch between precipitation products and gauges, and other limitations about this study. Meanwhile, it also puts forward some directions for future efforts and improvement. The detained contents are added in the revised manuscript.

12- Conclusions need to revise and well-round major and significant findings of current study

**Response:** the conclusions have been improved in this revised manuscript.
